# Supplementary material
Source: PubMed Central journal article supplement (PMC5328562)
Supplement: AAC.02228-16_zac003175985s1.pdf [file AAC.02228-16_zac003175985s1.pdf]

## Supplemental Tables

Table S1: Propensity models

| Variables included in propensity models                                | Pretreated<br>without<br>continuation | Pretreated with<br>continuation | <i>De novo</i> |
|------------------------------------------------------------------------|---------------------------------------|---------------------------------|----------------|
| Admitted to the nursing home in 365 days<br>prior to hospitalization   |                                       |                                 | x              |
| Age at culture collection                                              | x                                     | x                               | x              |
| Body mass index                                                        | x                                     | x                               | x              |
| Concurrent endocarditis                                                |                                       |                                 | x              |
| Concurrent joint infection                                             |                                       |                                 | x              |
| Concurrent osteomyelitis                                               | x                                     | x                               |                |
| Concurrent positive MRSA nares                                         |                                       |                                 | x              |
| Concurrent positive <i>S. aureus</i> culture, blood<br>vessel          | x                                     |                                 | x              |
| Concurrent positive <i>S. aureus</i> culture, bone                     |                                       |                                 | x              |
| Concurrent positive <i>S. aureus</i> culture,<br>cerebral spinal fluid |                                       | x                               |                |
| Concurrent positive <i>S. aureus</i> culture, lung                     |                                       | x                               |                |

|                                                           |   |   |   |
|-----------------------------------------------------------|---|---|---|
| Concurrent positive <i>S. aureus</i> culture, other sites |   | x |   |
| Concurrent positive <i>S. aureus</i> culture, skin        | x |   |   |
| Concurrent positive <i>S. aureus</i> culture, urine       |   | x |   |
| Concurrent skin infection                                 |   |   | x |
| Concurrent surgical site infection                        |   | x | x |
| Concurrent urinary tract infection                        | x |   |   |
| Current adverse effects of medical care                   | x | x |   |
| Current adverse effects of medical drugs                  | x |   |   |
| Current aftercare                                         | x |   |   |
| Current alcohol related disorders                         |   |   | x |
| Current amputation                                        | x |   |   |
| Current anemia                                            |   | x |   |
| Current anxiety                                           |   | x |   |
| Current arterial embolism or thrombosis                   | x |   |   |
| Current attention deficit disorder                        |   |   | x |
| Current bacteremia diagnosis code                         |   | x |   |

|                                                      |   |   |   |
|------------------------------------------------------|---|---|---|
| Current bone disease and musculoskeletal deformities | x |   |   |
| Current burn                                         |   | x |   |
| Current cancer                                       | x | x | x |
| Current cancer of head and neck                      |   | x |   |
| Current cancer of colon                              |   |   | x |
| Current cellulitis or abscess diagnosis code         |   |   | x |
| Current chronic kidney disease                       |   | x | x |
| Current chronic pulmonary disease                    |   | x | x |
| Current cognitive disorders                          | x |   | x |
| Current conduction disorders                         | x |   | x |
| Current deficiency and other anemia                  |   |   | x |
| Current dementia                                     |   | x | x |
| Current dialysis                                     | x | x |   |
| Current disorder of teeth or jaw                     | x |   |   |
| Current dizziness or vertigo                         |   | x |   |
| Current Elixhauser score                             | x | x | x |
| Current esophageal disorder                          | x |   | x |

|                                                  |   |   |   |
|--------------------------------------------------|---|---|---|
| Current gangrene                                 | x | x |   |
| Current genitourinary symptoms                   |   | x |   |
| Current heart valve disorder                     |   | x |   |
| Current hepatitis                                |   | x | x |
| Current history malignant neoplasm               | x | x |   |
| Current hypothyroidism                           | x |   |   |
| Current infective arthritis                      |   |   | x |
| Current large cell lymphoma                      | x |   |   |
| Current liver disease                            | x |   |   |
| Current maintenance chemotherapy<br>radiotherapy | x |   |   |
| Current malignant neoplasm                       | x |   |   |
| Current medical examination and<br>evaluation    |   | x |   |
| Current melanomas of skin                        |   | x |   |
| Current metastatic cancer                        |   | x | x |
| Current mood disorders                           | x |   |   |
| Current mycoses                                  |   | x |   |

|                                                            |   |   |   |
|------------------------------------------------------------|---|---|---|
| Current myocardial infarction                              | x | x | x |
| Current nonspecific chest pain                             | x | x | x |
| Current non traumatic joint disorders                      |   | x |   |
| Current occlusion or stenosis of pre-cerebral arteries     | x | x | x |
| Current osteoarthritis                                     | x | x |   |
| Current osteoporosis                                       |   | x |   |
| Current other & ill-defined heart diseases                 |   |   | x |
| Current other ear and sense organ disorders                |   | x |   |
| Current other gastrointestinal disorders                   |   |   | x |
| Current other hematologic conditions                       |   |   | x |
| Current other hereditary and degenerative nervous diseases |   |   | x |
| Current other lower respiratory disease                    | x |   |   |
| Current other nervous system disorders                     | x | x | x |
| Current other neurological disorders                       |   | x |   |
| Current other skin inflammation                            | x |   |   |
| Current peripheral vascular disease                        | x | x |   |

|                                                               |   |   |   |
|---------------------------------------------------------------|---|---|---|
| Current phlebitis                                             | x | x | x |
| Current place of occurrence (E codes)                         |   |   | x |
| Current <i>Pseudomonas</i> diagnosis code                     |   |   | x |
| Current residual codes unclassified                           | x | x |   |
| Current retinal detachment vascular occlusion and retinopathy |   |   | x |
| Current <i>S. aureus</i> diagnosis code                       |   |   | x |
| Current secondary malignancies                                | x |   |   |
| Current septicemia diagnosis code                             |   | x | x |
| Current shock diagnosis code                                  | x |   |   |
| Current spinal cord injury                                    |   | x |   |
| Current spondylosis                                           | x |   |   |
| Current <i>Streptococcus</i> diagnosis code                   |   | x |   |
| Current thyroid disease                                       |   | x |   |
| Current use of acid suppressing medications                   | x | x | x |
| Current use of aspirin                                        |   |   | x |
| Current use of corticosteroids                                |   | x | x |

|                                                       |   |   |   |
|-------------------------------------------------------|---|---|---|
| Current use of insulin                                | x | x |   |
| Current use of non-steroidal anti-inflammatory        | x | x |   |
| Current use of oral anti-hypertensives                | x | x | x |
| Current use of other cholesterol lowering medications | x |   | x |
| Current use of thyroid suppressants                   |   |   | x |
| Current valvular disease                              | x | x |   |
| Current weight loss                                   |   | x |   |
| Current asthma                                        |   | x |   |
| Duration of antibiotic therapy                        | x | x | x |
| Elevated temperature                                  | x |   |   |
| Elevated white blood cell count                       | x |   | x |
| Facility indicator                                    | x | x | x |
| Gender                                                | x | x | x |
| History of arterial embolism or thrombosis            |   | x | x |
| History of biliary tract disease                      |   |   | x |
| History of other skin ulcer diagnosis code            |   | x |   |

|                                                         |   |   |   |
|---------------------------------------------------------|---|---|---|
| History of natural/environment (E codes)                |   |   | x |
| History of acute myocardial infarction                  | x | x | x |
| History of adverse effect of medical drugs              | x |   | x |
| History of adverse effects of medical care              |   | x |   |
| History of alcohol related disorders                    | x |   |   |
| History of allergic reaction                            |   | x |   |
| History of amputation                                   | x |   |   |
| History of anemia                                       |   | x |   |
| History of anxiety                                      | x | x | x |
| History of bacterial infection diagnosis code           |   | x |   |
| History of blindness and vision defects                 |   | x |   |
| History of bone disease and musculoskeletal deformities | x |   |   |
| History of cancer                                       |   | x |   |
| History of cellulitis or abscess diagnosis code         | x |   |   |
| History of colon cancer                                 | x | x |   |
| History of coma stupor and brain damage                 |   |   | x |



|                                                 |   |   |   |
|-------------------------------------------------|---|---|---|
| History of conduction disorder                  |   |   | x |
| History of dementia                             |   | x |   |
| History of dialysis                             |   |   | x |
| History of disease of white blood cells         | x |   | x |
| History of diverticulosis and diverticulitis    |   |   | x |
| History of Elixhauser score                     | x | x | x |
| History of esophageal disorder                  | x | x |   |
| History of fluid or electrolyte disorder        | x | x | x |
| History of gastritis and duodenitis             |   | x | x |
| History of gastrointestinal hemorrhage          |   | x |   |
| History of gout and other crystal arthropathies |   |   | x |
| History of Gram Negative diagnosis code         | x |   | x |
| History of headache including migraine          | x | x |   |
| History of heart valve disorder                 | x |   |   |
| History of hepatitis                            |   | x |   |
| History of hypothyroidism                       |   |   | x |

|                                                                  |   |   |   |
|------------------------------------------------------------------|---|---|---|
| History of immunization and screening for infectious disease     | x |   |   |
| History of infective arthritis                                   | x |   | x |
| History of liver disease                                         |   | x | x |
| History of lymphoma                                              |   | x |   |
| History of malignant neoplasm                                    | x | x | x |
| History of melanomas of skin                                     |   | x |   |
| History of metastatic cancer                                     | x |   |   |
| History of methicillin-resistant <i>S. aureus</i> diagnosis code |   |   | x |
| History of motor vehicle traffic                                 | x |   |   |
| History of neoplasm w/ unspecified nature or uncertain behavior  | x | x |   |
| History of nephrotic syndrome                                    |   |   | x |
| History of neutropenia                                           |   |   | x |
| History of nonspecific chest pain                                |   | x | x |
| History of non-traumatic joint disorders                         |   | x |   |
| History of occlusion or stenosis of pre-cerebral arteries        | x |   |   |

|                                                        |   |   |   |
|--------------------------------------------------------|---|---|---|
| History of osteomyelitis                               | x |   |   |
| History of osteoporosis                                | x |   |   |
| History of other & ill-defined heart diseases          |   |   | x |
| History of other aftercare                             |   |   | x |
| History of other congenital anomalies                  |   |   | x |
| History of other diseases of vein and lymphatic system | x |   |   |
| History of other endocrine disorder                    |   |   | x |
| History of other eye disorder                          | x |   |   |
| History of other hematologic conditions                | x | x |   |
| History of other immunocompromising disorder           | x |   |   |
| History of other leukemia                              | x |   |   |
| History of other neurological disorders                |   | x |   |
| History of peptic ulcer disease excluding bleeding     | x |   |   |
| History of peripheral vascular disease                 |   | x | x |
| History of place of occurrence (E Codes)               |   | x |   |
| History of poisoning                                   |   | x |   |

|                                                                  |   |   |   |
|------------------------------------------------------------------|---|---|---|
| History of pulmonary circulation disorders                       | x | x |   |
| History of rehabilitation care                                   | x | x |   |
| History of respiratory infection                                 | x |   |   |
| History of retinal detachment vascular occlusion and retinopathy | x |   |   |
| History of rheumatoid arthritis/collagen disorder                |   |   | x |
| History of <i>S. aureus</i> diagnosis code                       | x |   | x |
| History of secondary malignancies                                |   |   | x |
| History of septicemia diagnosis code                             | x |   |   |
| History of skin or subcutaneous tissue infection                 |   |   | x |
| History of solid tumor without metastasis                        |   |   | x |
| History of <i>Streptococcus</i> diagnosis code                   | x |   |   |
| History of substance related disorders                           | x | x |   |
| History of surgical site infection                               | x | x | x |
| History of tobacco use disorder                                  |   | x |   |
| History of transplant                                            | x |   |   |

|                                                          |   |   |   |
|----------------------------------------------------------|---|---|---|
| History of use of acid suppressing medication            | x | x | x |
| History of use antibiotics                               | x | x |   |
| History of use of anti-hypertensives                     | x | x | x |
| History of use of aspirin                                | x |   |   |
| History of use of corticosteroids                        | x | x |   |
| History of use of insulin                                | x | x | x |
| History of use of oral anti-diabetic agents              | x | x |   |
| History of use of other cholesterol lowering medications | x | x |   |
| History of use of non-steroidal anti-inflammatory drugs  |   | x | x |
| History of weight loss                                   | x |   | x |
| Hospital unit at treatment initiation                    | x | x | x |
| Hospitalization in last 180 days                         |   |   | x |
| Hospitalization in last 30 days                          | x | x |   |
| Influenza immunization in previous 90 days               | x | x | x |
| Initial antibiotic treatment                             | x | x | x |
| Low-density lipoprotein                                  | x | x | x |

|                                                                      |      |      |      |
|----------------------------------------------------------------------|------|------|------|
| Methicillin-resistant or susceptible<br><i>Staphylococcus aureus</i> | x    | x    | x    |
| Other current immunodeficiency                                       |      | x    |      |
| Race                                                                 | x    | x    | x    |
| Region of facility                                                   | x    | x    | x    |
| Sepsis                                                               | x    | x    | x    |
| Source of admission                                                  | x    | x    | x    |
| Surgical procedure during the current admission                      | x    |      |      |
| Surgical procedure in last 30 days                                   | x    |      |      |
| Surgical procedure in the last year                                  |      | x    |      |
| Time to antibiotic treatment initiation from culture collection      | x    | x    | x    |
| Time to culture collection from admission                            | x    | x    | x    |
| Treating specialty                                                   | x    | x    | x    |
| Year of infection                                                    | x    | x    | x    |
| C-statistic                                                          | 0.89 | 0.92 | 0.86 |

Table S2: Clinical outcomes, pretreated statin users without continuation: unadjusted, quintile adjusted, and inverse probability of treatment weighted (IPTW) results

| Outcome                    | Model      | No of events:<br>non-users | No of patients:<br>non-users | No of events:<br>pretreated<br>without<br>continuation | No of patients:<br>pretreated<br>without<br>continuation | Hazard ratio | Lower confidence level | Upper confidence level |
|----------------------------|------------|----------------------------|------------------------------|--------------------------------------------------------|----------------------------------------------------------|--------------|------------------------|------------------------|
| Time to 14-Day Mortality   | Unadjusted | 2141                       | 16448                        | 40                                                     | 344                                                      | 0.884        | 0.647                  | 1.209                  |
| Time to 14-Day Mortality   | Quintile   |                            |                              |                                                        |                                                          | 0.806        | 0.587                  | 1.108                  |
| Time to 14-Day Mortality   | IPTW       |                            |                              |                                                        |                                                          | 3.805        | 3.260                  | 4.441                  |
| Time to 30-Day Mortality   | Unadjusted | 3337                       | 16448                        | 64                                                     | 344                                                      | 0.907        | 0.709                  | 1.162                  |
| Time to 30-Day Mortality   | Quintile   |                            |                              |                                                        |                                                          | 0.846        | 0.658                  | 1.088                  |
| Time to 30-Day Mortality   | IPTW       |                            |                              |                                                        |                                                          | 2.837        | 2.456                  | 3.278                  |
| Time to 30-Day Readmission | Unadjusted | 3362                       | 13546                        | 86                                                     | 290                                                      | 1.245        | 1.005                  | 1.542                  |

|                                         |            |       |       |     |     |       |       |       |
|-----------------------------------------|------------|-------|-------|-----|-----|-------|-------|-------|
| Time to 30-Day Readmission              | Quintile   |       |       |     |     | 1.153 | 0.926 | 1.436 |
| Time to 30-Day Readmission              | IPTW       |       |       |     |     | 1.256 | 1.004 | 1.571 |
| Time to 30-Day S. aureus<br>Reinfection | Unadjusted |       |       |     |     | 1.075 | 0.697 | 1.657 |
| Time to 30-Day S. aureus<br>Reinfection | Quintile   | 914   | 13546 | 21  | 290 | 0.949 | 0.610 | 1.475 |
| Time to 30-Day S. aureus<br>Reinfection | IPTW       |       |       |     |     | 1.281 | 0.843 | 1.947 |
| Time to Discharge                       | Unadjusted |       |       |     |     | 1.082 | 0.963 | 1.215 |
| Time to Discharge                       | Quintile   | 13546 | 16448 | 290 | 344 | 1.068 | 0.948 | 1.203 |
| Time to Discharge                       | IPTW       |       |       |     |     | 1.261 | 1.117 | 1.424 |
| Time to ICU Discharge                   | Unadjusted |       |       |     |     | 1.138 | 0.891 | 1.454 |
| Time to ICU Discharge                   | Quintile   | 2415  | 3262  | 66  | 78  | 1.062 | 0.826 | 1.367 |
| Time to ICU Discharge                   | IPTW       |       |       |     |     | 1.112 | 0.789 | 1.568 |



|                             |            |      |       |    |     |       |       |       |
|-----------------------------|------------|------|-------|----|-----|-------|-------|-------|
| Time to Inpatient Mortality | Unadjusted |      |       |    |     | 0.947 | 0.724 | 1.240 |
| Time to Inpatient Mortality | Quintile   | 2902 | 16448 | 54 | 344 | 0.836 | 0.636 | 1.100 |
| Time to Inpatient Mortality | IPTW       |      |       |    |     | 3.756 | 3.234 | 4.362 |

Table S3: Clinical outcomes, pretreated statin users with continuation: unadjusted, quintile adjusted, and inverse probability of treatment weighted (IPTW) results

| Outcome                    | Model      | No of events:<br>non-users | No of patients:<br>non-users | No of events:<br>pretreated<br>with<br>continuation | No of patients:<br>pretreated<br>with<br>continuation | Hazard ratio | Lower confidence level | Upper confidence level |
|----------------------------|------------|----------------------------|------------------------------|-----------------------------------------------------|-------------------------------------------------------|--------------|------------------------|------------------------|
| Time to 14-Day Mortality   | Unadjusted |                            |                              |                                                     |                                                       | 0.466        | 0.250                  | 0.866                  |
| Time to 14-Day Mortality   | Quintile   | 2141                       | 16448                        | 10                                                  | 159                                                   | 0.437        | 0.234                  | 0.816                  |
| Time to 14-Day Mortality   | IPTW       |                            |                              |                                                     |                                                       | 0.146        | 0.067                  | 0.319                  |
| Time to 30-Day Mortality   | Unadjusted |                            |                              |                                                     |                                                       | 0.650        | 0.428                  | 0.987                  |
| Time to 30-Day Mortality   | Quintile   | 3337                       | 16448                        | 22                                                  | 159                                                   | 0.617        | 0.404                  | 0.942                  |
| Time to 30-Day Mortality   | IPTW       |                            |                              |                                                     |                                                       | 0.169        | 0.095                  | 0.300                  |
| Time to 30-Day Readmission | Unadjusted | 3362                       | 13546                        | 30                                                  | 136                                                   | 0.852        | 0.594                  | 1.220                  |

|                                      |            |       |       |     |     |       |       |       |
|--------------------------------------|------------|-------|-------|-----|-----|-------|-------|-------|
| Time to 30-Day Readmission           | Quintile   |       |       |     |     | 0.876 | 0.608 | 1.262 |
| Time to 30-Day Readmission           | IPTW       |       |       |     |     | 0.775 | 0.529 | 1.136 |
| Time to 30-Day S. aureus Reinfection | Unadjusted |       |       |     |     | 0.533 | 0.221 | 1.283 |
| Time to 30-Day S. aureus Reinfection | Quintile   | 914   | 13546 | 5   | 136 | 0.538 | 0.222 | 1.306 |
| Time to 30-Day S. aureus Reinfection | IPTW       |       |       |     |     | 0.383 | 0.132 | 1.114 |
| Time to Discharge                    | Unadjusted |       |       |     |     | 1.009 | 0.853 | 1.195 |
| Time to Discharge                    | Quintile   | 13546 | 16448 | 136 | 159 | 1.031 | 0.869 | 1.224 |
| Time to Discharge                    | IPTW       |       |       |     |     | 0.243 | 0.204 | 0.289 |
| Time to ICU Discharge                | Unadjusted |       |       |     |     | 1.245 | 0.914 | 1.695 |
| Time to ICU Discharge                | Quintile   | 2415  | 3262  | 41  | 47  | 1.220 | 0.888 | 1.675 |
| Time to ICU Discharge                | IPTW       |       |       |     |     | 0.823 | 0.409 | 1.656 |

|                             |            |      |       |    |     |       |       |       |
|-----------------------------|------------|------|-------|----|-----|-------|-------|-------|
| Time to Inpatient Mortality | Unadjusted |      |       |    |     | 0.815 | 0.541 | 1.229 |
| Time to Inpatient Mortality | Quintile   | 2902 | 16448 | 23 | 159 | 0.765 | 0.505 | 1.158 |
| Time to Inpatient Mortality | IPTW       |      |       |    |     | 1.388 | 1.190 | 1.619 |

Table S4: Clinical outcomes, *de novo* statin users: unadjusted, quintile adjusted, and inverse probability of treatment weighted (IPTW) results

| Outcome                    | Model      | No of events:<br>non-users | No of patients:<br>non-users | No of events:<br>pretreated<br><i>de novo</i> | No of patients:<br><i>de novo</i> | Hazard ratio | Lower confidence level | Upper confidence level |
|----------------------------|------------|----------------------------|------------------------------|-----------------------------------------------|-----------------------------------|--------------|------------------------|------------------------|
| Time to 14-Day Mortality   | Unadjusted | 2141                       | 16448                        | 18                                            | 187                               | 0.718        | 0.452                  | 1.141                  |
| Time to 14-Day Mortality   | Quintile   |                            |                              |                                               |                                   | 0.873        | 0.546                  | 1.397                  |
| Time to 14-Day Mortality   | IPTW       |                            |                              |                                               |                                   | 1.359        | 0.816                  | 2.265                  |
| Time to 30-Day Mortality   | Unadjusted | 3337                       | 16448                        | 31                                            | 187                               | 0.792        | 0.556                  | 1.128                  |
| Time to 30-Day Mortality   | Quintile   |                            |                              |                                               |                                   | 0.932        | 0.651                  | 1.335                  |
| Time to 30-Day Mortality   | IPTW       |                            |                              |                                               |                                   | 1.067        | 0.742                  | 1.535                  |
| Time to 30-Day Readmission | Unadjusted | 3362                       | 13546                        | 37                                            | 163                               | 0.910        | 0.658                  | 1.258                  |
| Time to 30-Day Readmission | Quintile   |                            |                              |                                               |                                   | 0.955        | 0.687                  | 1.326                  |

|                                      |            |       |       |     |     |        |       |         |
|--------------------------------------|------------|-------|-------|-----|-----|--------|-------|---------|
| Time to 30-Day Readmission           | IPTW       |       |       |     |     | 1.751  | 1.113 | 2.754   |
| Time to 30-Day S. aureus Reinfection | Unadjusted |       |       |     |     | 0.357  | 0.134 | 0.951   |
| Time to 30-Day S. aureus Reinfection | Quintile   | 914   | 13546 | 4   | 163 | 0.433  | 0.161 | 1.163   |
| Time to 30-Day S. aureus Reinfection | IPTW       |       |       |     |     | 12.332 | 1.211 | 125.587 |
| Time to Discharge                    | Unadjusted |       |       |     |     | 1.148  | 0.984 | 1.340   |
| Time to Discharge                    | Quintile   | 13546 | 16448 | 163 | 187 | 1.046  | 0.894 | 1.223   |
| Time to Discharge                    | IPTW       |       |       |     |     | 0.997  | 0.837 | 1.187   |
| Time to ICU Discharge                | Unadjusted |       |       |     |     | 1.099  | 0.798 | 1.514   |
| Time to ICU Discharge                | Quintile   | 2415  | 3262  | 38  | 49  | 1.008  | 0.728 | 1.396   |
| Time to ICU Discharge                | IPTW       |       |       |     |     | 0.966  | 0.635 | 1.47    |
| Time to Inpatient Mortality          | Unadjusted | 2902  | 16448 | 24  | 187 | 0.796  | 0.532 | 1.189   |

|                             |          |  |  |  |  |       |       |       |
|-----------------------------|----------|--|--|--|--|-------|-------|-------|
| Time to Inpatient Mortality | Quintile |  |  |  |  | 0.894 | 0.595 | 1.343 |
| Time to Inpatient Mortality | IPTW     |  |  |  |  | 1.063 | 0.715 | 1.58  |
